# Supplementary material for: Self-organizing capacity of nanocelluloses via droplet evaporation
Source: Royal Society of Chemistry journal article supplement (doi:10.1039/c3sm27822k), 2013-01-01
Supplement: c3sm27822k.pdf [file c3sm27822k.pdf]

## Supporting Information

### Self-Organizing Capacity of Nanocelluloses via Droplet Evaporation.

Kojiro Uetani, Hiroyuki Yano\*

*Research Institute for Sustainable Humanosphere, Kyoto University, Gokasho, Uji, Kyoto 611-0011, Japan.  
uetani-k@rish.kyoto-u.ac.jp, yano@rish.kyoto-u.ac.jp.*

#### Additional figures.

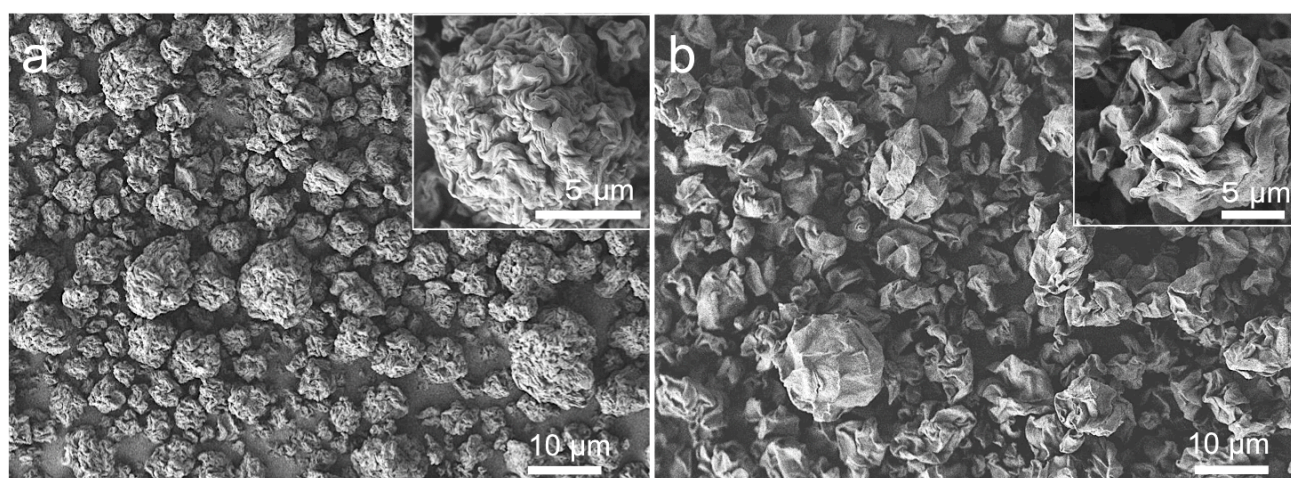

**Figure S1.** The MPs of the random-coiled flexible cellulose nanofibers from sugi pulp (a) and the slightly curved semi-flexible TNFs (b) sprayed at 0.3 vol%. Both types of MPs have a “crumpled sphere” appearance, with the crease depth depending on the fibril stiffness.

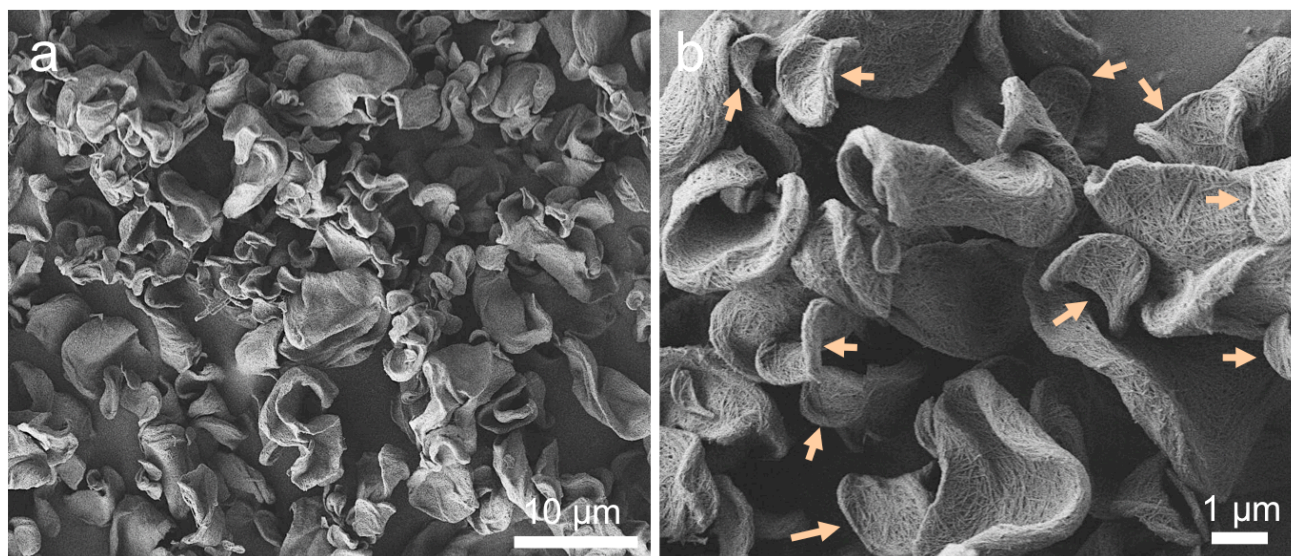

**Figure S2.** TNW-MPs sprayed at 0.3 vol% contained small MPs (indicated by arrows) with diameter 1~3 μm and a flattened shape produced by a thinner nematic ring.
